# Supplementary material for: Optimal selection of epitopes for TXP-immunoaffinity mass spectrometry
Source: Springer Nature journal article supplement (doi:10.1186/1748-7188-5-28), 2010-06-25

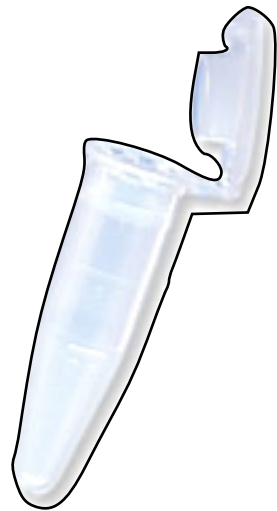

complex sample  
(digest)

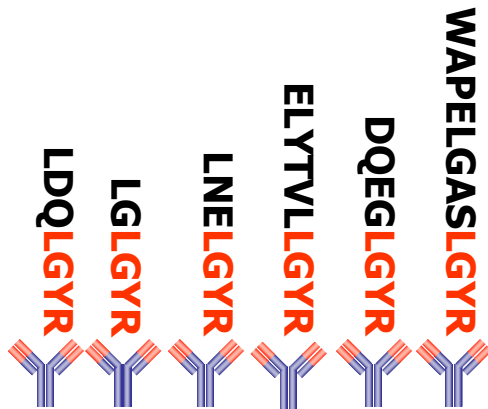

TXP immunoaffinity  
fractionation

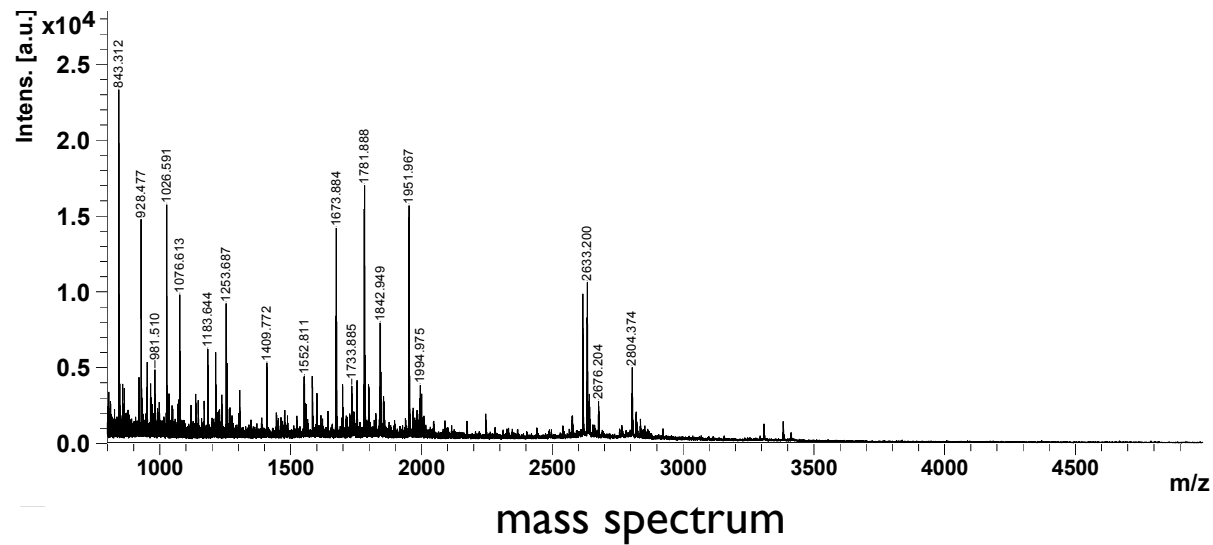

Supplement: 13015_2010_101_MOESM1_ESM.pdf [file 13015_2010_101_MOESM1_ESM.pdf]
