# Supplementary material for: Optimal selection of epitopes for TXP-immunoaffinity mass spectrometry
Source: Springer Nature journal article supplement (doi:10.1186/1748-7188-5-28), 2010-06-25
Supplement: 13015_2010_101_MOESM2_ESM.pdf [file 13015_2010_101_MOESM2_ESM.pdf]

unknown positions

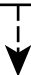

methionine

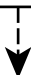

high abundant epitope

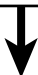

weight filter

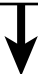

length filter

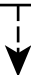

high abundant protein
